# Supplementary material for: A novel approach applying a chemical biology strategy in phenotypic screening reveals pathway-selective regulators of histone 3 K27 tri-methylation
Source: Royal Society of Chemistry journal article supplement (doi:10.1039/c3mb70413k), 2013-10-31

## Supplemental Material

### Figure S1.

A.) Anti-H3K27me3 antibody specifically recognizes trimethylation of Lysine 27 residue on histone H3.

B.) HCC1806 cells were allowed to recover overnight, then cells were treated with compounds and incubated for 3 days. After 3-day incubation, cells were fixed, stained with specific primary, secondary antibodies and DRAQ5 (to enable cellular identification and cell counting for toxicity), washed, and read on the Opera imager.

A

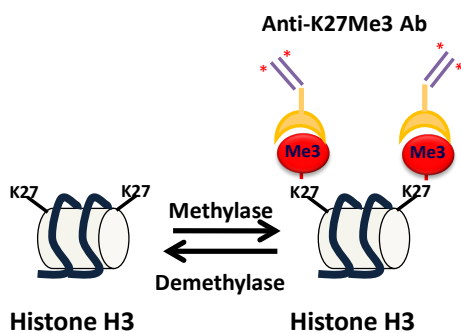

B

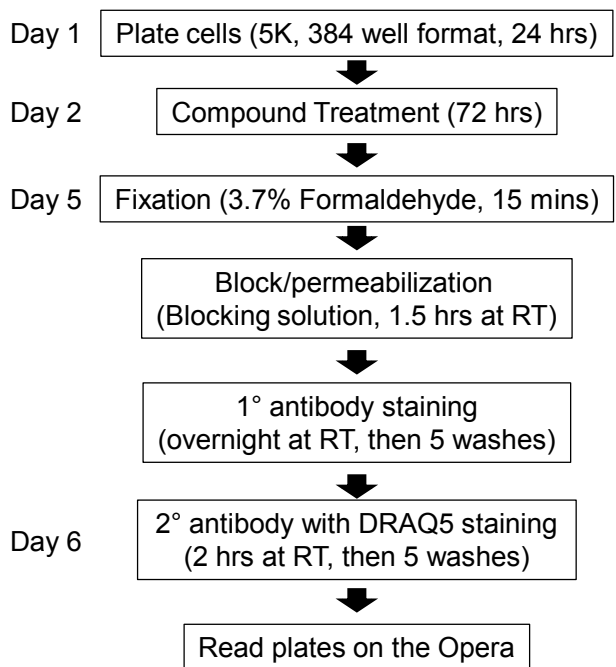

## Figure S2.

A.) Numbers of hits and their associated targets identified from H3K27me3 phenotypic screen using BDCS.

B & C.) Binned analysis of H3K27me3 enhancers and suppressors based on how many compounds from each target were identified as hits in the screen.

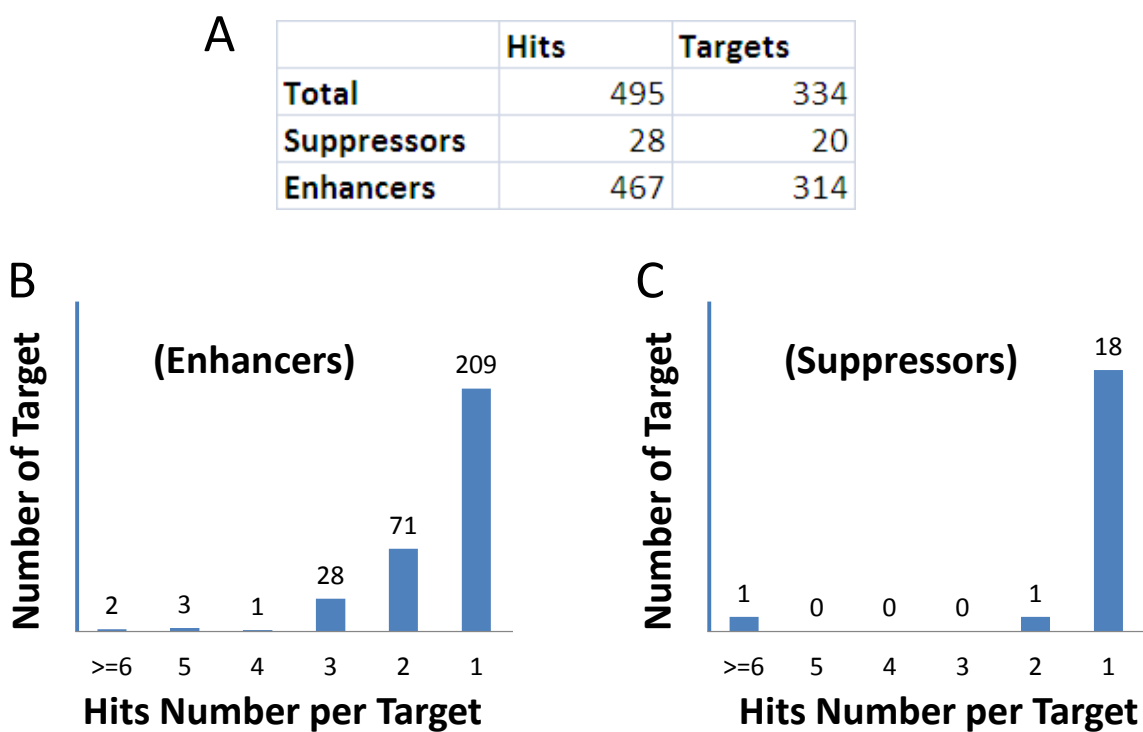

Supplement: c3mb70413k.pdf [file c3mb70413k.pdf]
